# Supplementary material for: Comparison of statistical models for nested association mapping in rapeseed (Brassica napus L.) through computer simulations
Source: PubMed Central journal article supplement (PMC4727311; doi:10.1186/s12870-016-0707-6), 2016-01-25
Supplement: 12870_2016_707_MOESM1_ESM.pdf [file 12870_2016_707_MOESM1_ESM.pdf]

**Table S1** The information of the 30 conserved genes and their annotations in *Arabidopsis thaliana* genome, where for those having no gene annotation in *A. thaliana* genome, the start and end positions in *A. thaliana* genome were given.

| Primer    | Chromosome of<br><i>Brassica napus</i> | Type   | Gene in<br><i>A. thaliana</i> | Chromosome of<br><i>A. thaliana</i> | Subject<br>Start | Subject<br>End |
|-----------|----------------------------------------|--------|-------------------------------|-------------------------------------|------------------|----------------|
| HiNK22853 | A01                                    | COS    | AT4G14342                     | Chr4                                | 8253550          | 8255508        |
| HiNK22859 | A02                                    | STS    | AT5G17920                     | Chr5                                | 5835038          | 5939487        |
| HiNK22857 | A02                                    | Random | AT1G75810                     | Chr1                                | 28461664         | 28462366       |
| HiNK22860 | A02                                    | COS    | AT5G22360                     | Chr5                                | 7404004          | 7405765        |
| HiNK22861 | A03                                    | STS    | AT4G00585                     | Chr4                                | 250955           | 252598         |
| HiNK22865 | A04                                    | STS    | AT2G27290                     | Chr2                                | 11678400         | 11679797       |
| HiNK22866 | A04                                    | STS    | AT3G63140                     | Chr3                                | 23326867         | 23328709       |
| HiNK22869 | A05                                    | Random | -                             | Chr5                                | 10362900         | 10362807       |
| HiNK22872 | A06                                    | STS    | AT3G04920                     | Chr3                                | 1360882          | 1362295        |
| HiNK22874 | A06                                    | STS    | AT3G49100                     | Chr3                                | 18196839         | 18198457       |
| HiNK22877 | A07                                    | STS    | AT4G24780                     | Chr4                                | 12770331         | 12772479       |
| HiNK22875 | A07                                    | Random | AT2G02680                     | Chr2                                | 745775           | 748573         |
| HiNK22882 | A08                                    | COS    | AT1G42970                     | Chr1                                | 16127381         | 16129843       |
| HiNK22883 | A09                                    | COS    | AT1G30630                     | Chr1                                | 10858298         | 10860261       |
| HiNK22888 | A10                                    | Random | AT1G02260                     | Chr1                                | 440441           | 442877         |
| HiNK22786 | C00                                    | STS    | AT3G59530                     | Chr3                                | 21993253         | 21995308       |
| HiNK22787 | C01                                    | Random | -                             | Chr4                                | 17735254         | 17735412       |
| HiNK22788 | C01                                    | Random | AT3G17465                     | Chr3                                | 5977817          | 5979652        |
| HiNK22793 | C02                                    | STS    | AT5G46030                     | Chr5                                | 18670117         | 18671373       |
| HiNK22797 | C03                                    | STS    | AT3G44680                     | Chr3                                | 16226556         | 16229954       |
| HiNK22799 | C04                                    | COS    | AT2G27450                     | Chr2                                | 11737432         | 11739690       |
| HiNK22800 | C04                                    | Random | -                             | Chr1                                | 16105441         | 16105495       |
| HiNK22804 | C05                                    | STS    | AT1G70580                     | Chr1                                | 26612632         | 26616069       |
| HiNK22803 | C05                                    | COS    | AT3G06610                     | Chr3                                | 2060737          | 2062067        |
| HiNK22805 | C06                                    | Random | -                             | Chr3                                | 14864155         | 14863837       |
| HiNK22806 | C06                                    | Random | -                             | Chr1                                | 26213761         | 26213585       |
| HiNK22807 | C06                                    | Random | -                             | Chr2                                | 4631826          | 4630468        |
| HiNK22814 | C08                                    | Random | AT1G17890                     | Chr1                                | 6154268          | 6155752        |
| HiNK22816 | C09                                    | Random | -                             | Chr5                                | 15962649         | 15962562       |
| HiNK22817 | C09                                    | Random | AT5G20840                     | Chr5                                | 7061103          | 7069219        |
