# Supplementary material for: Comparison of statistical models for nested association mapping in rapeseed (Brassica napus L.) through computer simulations
Source: PubMed Central journal article supplement (PMC4727311; doi:10.1186/s12870-016-0707-6), 2016-01-25

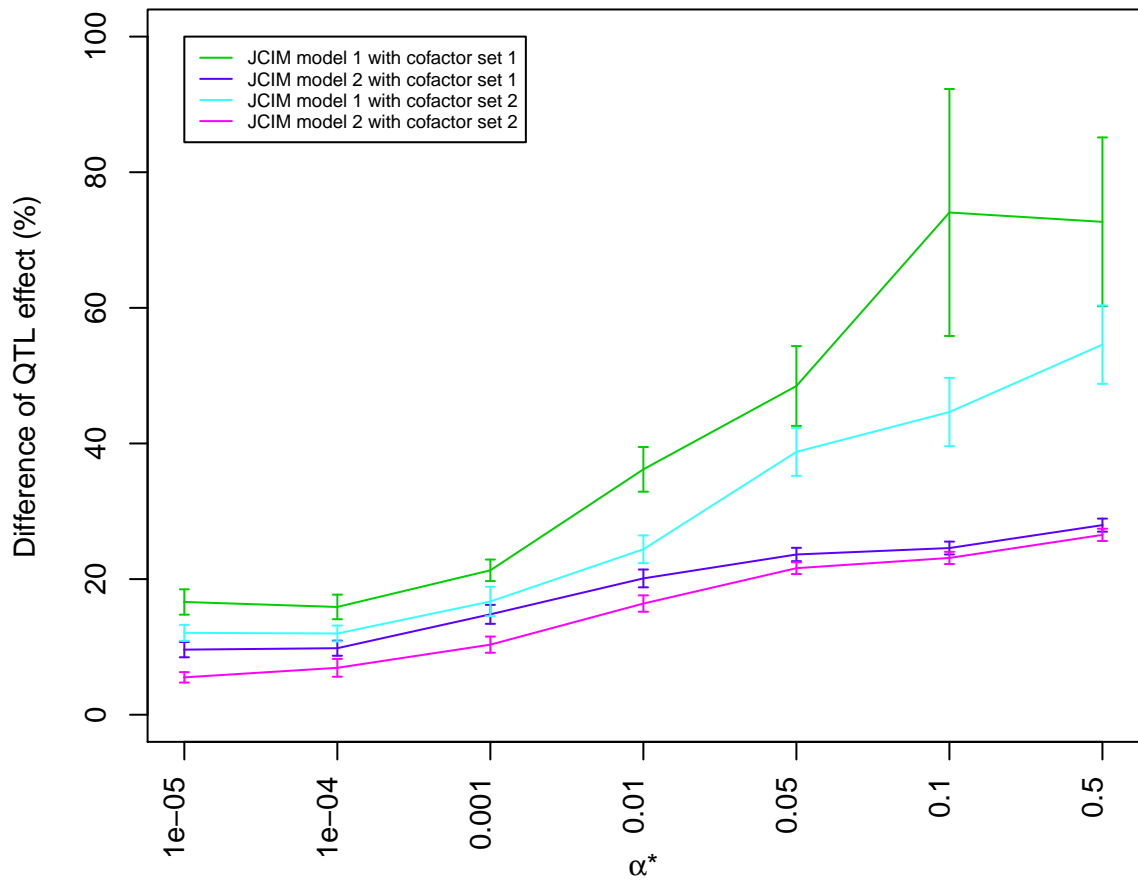

Supplement: 12870_2016_707_MOESM8_ESM.pdf [file 12870_2016_707_MOESM8_ESM.pdf]
