# Supplementary material for: Comparison of statistical models for nested association mapping in rapeseed (Brassica napus L.) through computer simulations
Source: PubMed Central journal article supplement (PMC4727311; doi:10.1186/s12870-016-0707-6), 2016-01-25
Supplement: 12870_2016_707_MOESM22_ESM.pdf [file 12870_2016_707_MOESM22_ESM.pdf]

**Table S2** Comparisons of the power of QTL detection  $1-\beta^*$  among the joint inclusive composite interval mapping (JICIM) model, joint composite interval mapping (JCIM) model 1 and 2 in a scenario with 50 QTLs, heritability  $h^2 = 0.8$ , cofactors selected by the Method 1, and 10 backcross nested association mapping (BC-NAM) subpopulations which were randomly selected from a total of 50 BC-NAM subpopulations, where the empirical type I error  $\alpha^*$  was calculated based the mapping results from JICIM model and the segregating markers and QTLs within the mapping population. For details see Materials and Methods.

| Replicate | JICIM         |           |                   |            | Power $1-\beta^*$ |        |
|-----------|---------------|-----------|-------------------|------------|-------------------|--------|
|           | Detected QTLs | True QTLs | Power $1-\beta^*$ | $\alpha^*$ | JCIM 1            | JCIM 2 |
| 1         | 76            | 5         | 0.128             | 0.0100     | 0.225             | 0.250  |
| 2         | 69            | 2         | 0.053             | 0.0095     | 0.211             | 0.237  |
| 3         | 59            | 3         | 0.075             | 0.0079     | 0.150             | 0.200  |
| 4         | 59            | 4         | 0.100             | 0.0078     | 0.075             | 0.225  |
| 5         | 69            | 1         | 0.029             | 0.0096     | 0.429             | 0.514  |
| 6         | 50            | 1         | 0.007             | 0.0244     | 0.293             | 0.268  |
| 7         | 68            | 1         | 0.026             | 0.0095     | 0.205             | 0.282  |
| 8         | 58            | 1         | 0.026             | 0.0080     | 0.205             | 0.231  |
| 9         | 62            | 2         | 0.051             | 0.0085     | 0.205             | 0.205  |
| 10        | 73            | 1         | 0.027             | 0.0102     | 0.189             | 0.243  |
| Average   |               |           | 0.052             |            | 0.219             | 0.266  |
